# Supplementary material
Source: PubMed Central journal article supplement (PMC5393631)
Supplement: NIHMS853512-supplement-1.pdf [file NIHMS853512-supplement-1.pdf]

**Table S1:** Number of tomograms of minicells and sub-tomograms of injectisomes processed in this study

| <b>Strain</b> | <b>Relevant Genotype</b>   | <b>Tomograms</b> | <b>Sub-tomograms</b> |
|---------------|----------------------------|------------------|----------------------|
| SB1780        | <i>wild-type</i>           | 1,470            | 5,274                |
| SB3112        | $\Delta invA$              | 107              | 1,095                |
| SB3131        | $\Delta orgA$              | 336              | 846                  |
| SB3050        | $\Delta orgB$              | 224              | 787                  |
| SB3046        | $\Delta spaO$              | 206              | 766                  |
| SB3092        | $\Delta invC$              | 119              | 1,144                |
| SB3047        | $\Delta spaO \Delta invA$  | 178              | 1,018                |
| SB2841        | $\Delta prgIJ \Delta invI$ | 244              | 1,068                |
| SB3113        | $\Delta spaPQRS$           | 89               | 504                  |
| SB3051        | <i>sfGFP-spaO</i>          | 650              | 3,032                |
| SB3063        | <i>invA-sfGFP</i>          | 111              | 860                  |
| SB3064        | <i>mEos3.2-prgH</i>        | 300              | 765                  |
| SB3065        | <i>orgA-mEos3.2</i>        | 382              | 2,871                |
| SB3066        | <i>orgB-mEos3.2</i>        | 368              | 2,385                |
| SB3067        | <i>invC-mEos3.2</i>        | 194              | 1,107                |
| SB3068        | <i>3xF-mEos3.2-invI</i>    | 332              | 4,830                |
| SB3085        | PAFP-prgH $\Delta spaO$    | 282              | 953                  |
| 17 in total   |                            | 5,592 in total   | 29,307 in total      |
